## ERRATUM

The German State Medical Association Rheinland-Pfalz has determined that contributing author Joachim Boldt did not follow the Code of Deontology to ask for approval by their ethics committee as is required but did obtain review and approval by the private "freiburger ethik-kommission international."

### **Development and Feasibility of a Scale to Assess Postoperative Recovery: The Post-operative Quality Recovery Scale: Erratum**

#### **Reference**

Royse CF, Newman S, Chung F, Stygall J, McKay RE, Boldt J, Servin FS, Hurtado I, Hannallah R, Yu B, Wilkinson DJ: Development and Feasibility of a Scale to Assess Postoperative Recovery: The Post-operative Quality Recovery Scale. ANESTHESIOLOGY 2010; 113:892-905
